# Supplementary material for: The concise synthesis and biological evaluation of C-glycosyl chalcone analogues inspired by the natural product aspalathin
Source: Royal Society of Chemistry journal article supplement (doi:10.1039/c6ra26969a), 2017-01-01
Supplement: c6ra26969a1.pdf [file c6ra26969a1.pdf]

## Supporting Information

For

### Concise Synthesis and Biological Evaluation of C-Glycosyl Chalcone

#### Analogues Inspired by Natural Product Aspalathin

Zhang T., Fang Z. J.\*

School of Chemical Engineering, Nanjing University of Science & Technology,

200 Xiaolingwei, Nanjing 210094, China

E-mail: Fang Z. J.\* - zjfang@njust.edu.cn.

• Corresponding author

|                                                                 |            |
|-----------------------------------------------------------------|------------|
| <b>Cytotoxicity assay.....</b>                                  | <b>S2</b>  |
| <b>Procedures and characterization data for compounds:.....</b> | <b>S3</b>  |
| <b>NMR Spectra for compounds.....</b>                           | <b>S10</b> |

## Cytotoxicity assay

The MTT (3-(4,5-dimethylthiazol-2-yl)-2,5-diphenyl-2H-tetrazolium bromide) assay was performed. In vitro experiments were performed using HepG2 cell and MCF-7 cell. The cells were cultured in complete DMEM (high glucose) medium and RPMI-1640 medium in an atmosphere of 5% CO<sub>2</sub> at 37 °C respectively. Cells were seeded in a 96-well plate at a concentration of  $1.0 \times 10^4$  cells/well and allowed to adhere overnight. Five replicates were prepared for each treatment and cultured for 48 or 72 h. After 20  $\mu$ L of MTT (5 mg/mL) was added to each well, the cells were cultured for another 4 h. The supernatant was discarded. After 150  $\mu$ L of DMSO was added to each well, the samples were incubated for 30 min and then swirled for 10 min. The absorbance (A) at 570 nm was measured using a microplate reader. Experiments were repeated three times and averaged.

## Procedures and characterization data for compounds:

### Compound 1

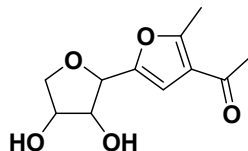

To a solution of glucose (1.8g, 10mmol) and acetylacetone (1.54ml 15mmol) in water (5mL) was added  $\text{CoCl}_2$  (10% 0.13g) at room temperature. The reaction mixture was stirred and refluxed at  $90^\circ\text{C}$  overnight. After completion of the reaction as indicated by TLC (1:4 petroleum ether–ethyl acetate), the reaction mixture was extracted by ethyl acetate, and the organic layer was evaporated to dryness under reduced pressure. The residue was purified by recrystallization using petroleum ether and ethyl acetate and furnished pure compound **1** (1.97g, 75%).

$^1\text{H}$  NMR (300 MHz,  $\text{CDCl}_3$ )  $\delta$  6.57 (s, 1H), 4.61 (d,  $J = 6.2$  Hz, 1H), 4.32 (t,  $J = 4.6$  Hz, 2H), 4.19 (dd,  $J = 10.0, 4.3$  Hz, 1H), 3.85 (dd,  $J = 13.0, 3.7$  Hz, 2H), 3.76 (s, 1H), 2.52 (s, 3H), 2.34 (s, 3H).  $^{13}\text{C}$  NMR (75 MHz,  $\text{CDCl}_3$ ):  $\delta$  193.9, 158.2, 149.2, 121.1, 108.4, 75.9, 73.7, 72.1, 70.0, 28.1, 13.6. MS (ESI +C):  $[\text{M} + \text{Na}]^+$ , 250. Elemental Anal. Found: C (58.21%) H (6.38%) Calcd for  $\text{C}_{22}\text{H}_{28}\text{O}_8 = \text{C}$  (58.09%) H (6.45%).

### Compound 2a

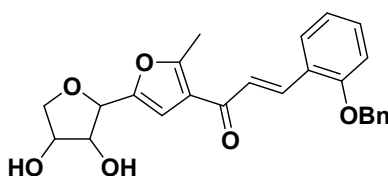

To a solution of 3-Acetyl-5-C-(2,3-dihydroxy-1,4-anhydro- $\beta$ -D-erythro-tetrofuranosyl)-2-methylfuran **1** (0.226g, 1.0mmol) and aromatic aldehydes (0.32g, 1.5mmol) in ethanol (4mL) was added NaOH (20%, 0.15mL) at room temperature. The reaction mixture was placed in a preheated oil bath and stirred at  $60^\circ\text{C}$  for 6 h. After completion of the reaction as indicated by TLC (1:2 petroleum ether-ethyl acetate), the reaction mixture was evaporated to dryness under reduced pressure, then dissolved in dichloromethane, washed by brine. The organic phase was collected and dried over anhydrous  $\text{Na}_2\text{SO}_4$ . The solvent was evaporated under reduced pressure and the residue was further purified by silica gel column chromatography using 2:1 petroleum ether-ethyl acetate to furnish pure products.

Obtained in 82% yield; orange powders; mp 120-121 °C; <sup>1</sup>H NMR (500 MHz, CDCl<sub>3</sub>) δ 7.95 (d, *J* = 15.8 Hz, 1H, =CH-Ar), 7.55 (dd, *J* = 7.6, 1.5 Hz, 1H, aromatic), 7.47 (m, *J* = 5.3, 3.1 Hz, 2H, aromatic), 7.44 – 7.32 (m, 3H, aromatic), 7.04 – 6.97 (m, 4H, aromatic, O=C-CH=), 6.98-7.01 (m, 2H, aromatic), 6.38 (s, 1H, H-furan), 5.14 (s, 2H, -CH<sub>2</sub>Ph), 4.61 (d, *J* = 6.9 Hz, 1H, H-1), 4.40 (dd, *J* = 5.0, 1.9 Hz, 1H, H-3), 4.35 (d, *J* = 6.5 Hz, 1H, H-2), 4.25 (dd, *J* = 10.1, 4.9 Hz, 1H, H-4a), 3.90 (dd, *J* = 10.1, 3.0 Hz, 1H, H-4b), 3.24 (s, 1H, OH), 2.97 (s, 1H, OH), 2.53 (s, 3H, -CH<sub>3</sub>). <sup>13</sup>C NMR (75 MHz, CDCl<sub>3</sub>): δ 186.3, 159.9, 158.1, 149.3, 139.5, 131.5, 131.1, 128.8, 127.9, 125.1, 121.0, 112.3, 109.5, 74.5, 73.2, 71.0, 70.5, 14.5. LC-MS (ESI +H): 421.01. HRMS (ESI) *m/z*: calcd for C<sub>25</sub>H<sub>24</sub>O<sub>6</sub> [M + Na]<sup>+</sup> 443.1573, found 443.1469.

### Compound 2b

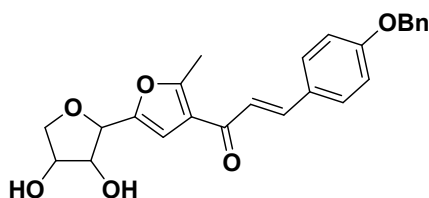

To a solution of 3-Acetyl-5-C-(2,3-dihydroxy-1,4-anhydro-β-D-erythro-tetrofuranosyl)-2-methylfuran **1** (0.226g, 1.0mmol) and aromatic aldehydes (0.32g, 1.5mmol) in ethanol (4mL) was added NaOH (20%, 0.15mL) at room temperature. The reaction mixture was placed in a preheated oil bath and stirred at 60 °C for 6 h. After completion of the reaction as indicated by TLC (1:2 petroleum ether-ethyl acetate), the reaction mixture was evaporated to dryness under reduced pressure, then dissolved in dichloromethane, washed by brine. The organic phase was collected and dried over anhydrous Na<sub>2</sub>SO<sub>4</sub>. The solvent was evaporated under reduced pressure and the residue was further purified by silica gel column chromatography using 2:1 petroleum ether-ethyl acetate to furnish pure products.

Obtained in 85% yield; orange powders; mp 124.5-125.5 °C; <sup>1</sup>H NMR (500 MHz, CDCl<sub>3</sub>) δ 7.68 (d, *J* = 15.6 Hz, 1H, =CH-Ar), 7.54 (d, *J* = 8.7 Hz, 2H, aromatic), 7.46 – 7.37 (m, 5H, aromatic), 7.35 (d, *J* = 7.0 Hz, 1H, aromatic), 7.04 (d, *J* = 15.6 Hz, 1H, O=C-CH=), 6.98 (d, *J* = 8.8 Hz, 2H, aromatic), 6.71 (s, 1H, H-furan), 5.10 (s, 2H, -CH<sub>2</sub>Ph), 4.69 (d, *J* = 6.4 Hz, 1H, H-1), 4.41 (m, 2H, H-2, H-3), 4.27 (dd, *J* = 10.1, 4.7 Hz, 1H, H-4a), 3.91 (dd, *J* = 10.1, 2.7 Hz, 1H, H-4b), 3.26 (s, 1H, OH), 2.96 (s, 1H, OH), 2.62 (s, 3H, -CH<sub>3</sub>). <sup>13</sup>C NMR (75 MHz, CDCl<sub>3</sub>): δ 185.9, 160.8, 159.7, 149.8, 143.3, 136.3, 130.2, 128.6, 127.4, 122.4, 121.4, 115.2, 109.2, 74.6, 73.2, 71.0, 70.0, 14.6. LC-MS (ESI +H): 421.08. HRMS (ESI) *m/z*: calcd for C<sub>25</sub>H<sub>24</sub>O<sub>6</sub> [M + Na]<sup>+</sup> 443.1573, found 443.1466.

### Compound 2c

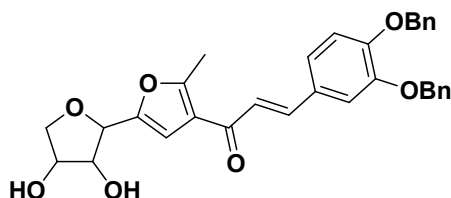

To a solution of 3-Acetyl-5-C-(2,3-dihydroxy-1,4-anhydro- $\beta$ -D-erythro-tetrahydrofuran-2-yl)-2-methylfuran **1** (0.226g, 1.0mmol) and aromatic aldehydes (0.48g, 1.5mmol) in ethanol (4mL) was added NaOH (20%, 0.15mL) at room temperature. The reaction mixture was placed in a preheated oil bath and stirred at 60 °C for 6 h. After completion of the reaction as indicated by TLC (1:2 petroleum ether-ethyl acetate), the reaction mixture was evaporated to dryness under reduced pressure, then dissolved in dichloromethane, washed by brine. The organic phase was collected and dried over anhydrous Na<sub>2</sub>SO<sub>4</sub>. The solvent was evaporated under reduced pressure and the residue was further purified by silica gel column chromatography using 2:1 petroleum ether-ethyl acetate to furnish pure products.

Obtained in 80% yield; orange powders; mp 123-123.5 °C; <sup>1</sup>H NMR (500 MHz, CDCl<sub>3</sub>)  $\delta$  7.58 (d, *J* = 15.6 Hz, 1H, =CH-Ar), 7.44 (dd, *J* = 14.3, 7.4 Hz, 4H, aromatic), 7.36 (t, *J* = 7.4 Hz, 4H, aromatic), 7.33 – 7.25 (m, 3H, aromatic), 7.16 (d, *J* = 1.8 Hz, 1H, aromatic), 7.11 (dd, *J* = 8.4, 1.8 Hz, 1H, aromatic), 6.91 (dd, *J* = 15.6, 12.0 Hz, 2H, aromatic, O=C-CH=), 6.68 (s, 1H, H-furan), 5.16 (d, *J* = 4.8 Hz, 4H, -CH<sub>2</sub>Ph), 4.68 (d, *J* = 6.1 Hz, 1H, H-1), 4.40 – 4.33 (m, 2H, H-2, H-3), 4.23 (dd, *J* = 10.0, 4.6 Hz, 1H, H-4a), 3.89 (dd, *J* = 10.0, 2.1 Hz, 1H, H-4b), 2.56 (s, 3H, -CH<sub>3</sub>). <sup>13</sup>C NMR (75 MHz, CDCl<sub>3</sub>):  $\delta$  185.9, 159.7, 151.3, 150.0, 148.8, 143.6, 136.8, 136.5, 128.5, 127.9, 127.3, 127.1, 123.5, 122.4, 121.7, 114.1, 109.1, 74.6, 73.2, 71.4, 70.9, 14.6. LC-MS (ESI +H): 527.08. HRMS (ESI) *m/z*: calcd for C<sub>32</sub>H<sub>30</sub>O<sub>7</sub> [M + Na]<sup>+</sup> 549.1992, found 549.1885.

### Compound 3a

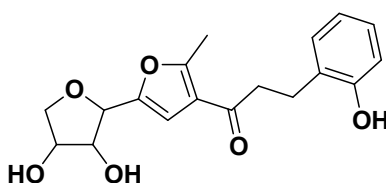

A suspension of compound **2a** (0.21 g, 0.5 mmol) and 10% Pd/C (50 mg) in dichloromethane (5 mL) –

MeOH (10 mL) was stirred under H<sub>2</sub> at atmospheric pressure for 4h. The reaction mixture was filtered, concentrated under a vacuum, and purified by silica gel column chromatography using 1:2 petroleum ether-ethyl acetate to furnish pure products.

Obtained in 63% yield; colourless oil; <sup>1</sup>H NMR (500 MHz, CDCl<sub>3</sub>) δ 7.05 – 7.00 (m, 2H, aromatic), 6.80 (dd, *J* = 9.7, 3.6 Hz, 2H, aromatic), 6.56 (s, 1H, H-furan), 4.59 (d, *J* = 5.4 Hz, 1H, H-1), 4.34 – 4.24 (m, 2H, H-3, H-2), 4.17 (dd, *J* = 8.1, 1H, 3.8 Hz, H-4a), 3.83 (dd, *J* = 8.1, 2.3 Hz, 1H, H-4b), 3.04 (dd, *J* = 6.5, 3.5 Hz, 2H, O=C-CH<sub>2</sub>-), 2.87 (dd, *J* = 7.5, 3.2 Hz, 2H, -CH<sub>2</sub>-Ar), 2.50 (s, 3H, -CH<sub>3</sub>). <sup>13</sup>C NMR (75 MHz, CDCl<sub>3</sub>): δ 198.1, 160.2, 154.2, 150.0, 130.5, 127.9, 127.7, 120.9, 120.6, 117.2, 108.9, 74.6, 73.1, 70.9, 42.6, 23.3, 14.7. LC-MS (ESI +C): 333.08. HRMS (ESI) *m/z*: calcd for C<sub>18</sub>H<sub>20</sub>O<sub>6</sub> [M + Na]<sup>+</sup> 355.1260, found 355.1154.

### Compound 3b

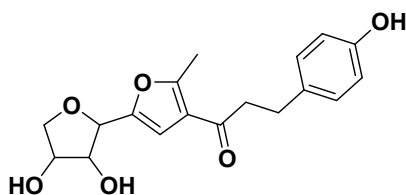

A suspension of compound **2b** (0.21 g, 0.5 mmol) and 10% Pd/C (50 mg) in dichloromethane (5 mL) – MeOH (10 mL) was stirred under H<sub>2</sub> at atmospheric pressure for 4h. The reaction mixture was filtered, concentrated under a vacuum, and purified by silica gel column chromatography using 1:2 petroleum ether-ethyl acetate to furnish pure products.

Obtained in 67% yield; colourless oil; <sup>1</sup>H NMR (500 MHz, DMSO-d<sub>6</sub>) δ 9.13 (s, 1H, PhOH), 7.01 (d, *J* = 8.3 Hz, 2H, aromatic), 6.83 (s, 1H, H-furan), 6.64 (d, *J* = 8.2 Hz, 2H, aromatic), 5.09 (d, *J* = 6.1 Hz, 1H, OH), 4.99 (d, *J* = 3.2 Hz, 1H, OH), 4.46 (d, *J* = 6.6 Hz, 1H, H-1), 4.10 (t, *J* = 5.2 Hz, 2H, H-2, H-3), 4.00 (dd, *J* = 9.1, 3.9 Hz, 1H, H-4a), 3.69 – 3.50 (dd, *J* = 9.1, 3.9 Hz, 1H, H-4b), 2.99 (t, *J* = 7.5 Hz, 2H, O=C-CH<sub>2</sub>-), 2.73 (t, *J* = 7.4 Hz, 2H, -CH<sub>2</sub>-Ar), 2.50 (s, 5H, -CH<sub>3</sub>). <sup>13</sup>C NMR (75 MHz, DMSO-d<sub>6</sub>): δ 195.7, 157.7, 155.8, 151.6, 131.6, 129.6, 121.6, 115.4, 109.3, 76.2, 74.8, 73.1, 70.7, 42.8, 28.7, 14.5. LC-MS (ESI +C): 333.07. HRMS (ESI) *m/z*: calcd for C<sub>18</sub>H<sub>20</sub>O<sub>6</sub> [M + Na]<sup>+</sup> 355.1260, found 355.1153.

### Compound 3c

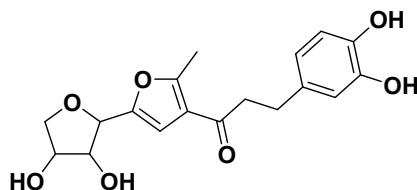

A suspension of compound **2c** (0.26 g, 0.5 mmol) and 10% Pd/C (50 mg) in dichloromethane (5 mL) – MeOH (10 mL) was stirred under H<sub>2</sub> at atmospheric pressure for 4h. The reaction mixture was filtered, concentrated under a vacuum, and purified by silica gel column chromatography using 1:2 petroleum ether-ethyl acetate to furnish pure products.

Obtained in 70% yield; colourless oil; <sup>1</sup>H NMR (500 MHz, DMSO-d<sub>6</sub>) δ 8.70 (s, 1H, PhOH), 8.62 (s, 1H, PhOH), 6.83 (s, 1H, aromatic), 6.61 (m, 2H, aromatic, H-furan), 6.56 (dd, *J* = 8.1, 1.75 Hz, 1H, aromatic), 5.1 (d, 1H, OH), 5.0 (d, 1H, OH), 4.47 (d, *J* = 6.6 Hz, H-1), 4.12 (m, 2H, H-2, H-3), 4.02 (m, 1H, H-4a), 3.62 (dd, *J* = 9.1, 3.9 Hz, 1H, H-4b), 2.98 (t, *J* = 7.5 Hz, 2H, O=C-CH<sub>2</sub>-), 2.70 (t, *J* = 7.4 Hz, 2H, -CH<sub>2</sub>-Ar), 2.50 (s, 3H, -CH<sub>3</sub>). <sup>13</sup>C NMR (75 MHz, DMSO-d<sub>6</sub>): δ 195.7, 157.7, 151.5, 14.5, 143.6, 132.3, 121.6, 119.2, 116.1, 115.8, 109.3, 76.2, 74.8, 73.1, 70.7, 28.7, 14.5. LC-MS (ESI -H): 346.85. HRMS (ESI) *m/z*: calcd for C<sub>18</sub>H<sub>20</sub>O<sub>7</sub> [M + Na]<sup>+</sup> 355.1260, found 371.1084.

### Compound 5a

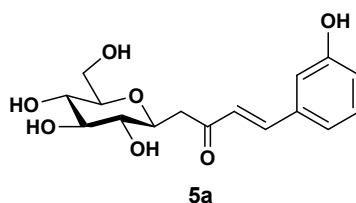

To a solution of 1-C-(β-D-glucopyranosyl)-propan-2-one (5.0 g, 23.0mmol) and 3-hydroxybenzaldehyde (3.42g 28.0mmol) in ethanol (4.5mL) was added TEA (0.11 mL, 0.77mmol) and proline (0.4g 3.45mmol) at room temperature. The reaction mixture was stirred at r.t. for 48 h. After completion of the reaction as indicated by TLC (1:2 petroleum ether-ethyl acetate), the product was precipitated in the solvent (ethanol). Then filtered the product and washed with cold water. The pure product was then obtained 5.07g, in 82.7% yield; light yellow powders; <sup>1</sup>H NMR (500 MHz, DMSO) δ 9.60 (s, 1H, PhOH), 7.50 (d, *J* = 16.2 Hz, 1H, H-9), 7.23 (t, *J* = 7.8 Hz, 1H, H-13), 7.14 (d, *J* = 7.6 Hz, 1H, H-11), 7.05 (s, 1H, H-10), 6.94 – 6.74 (m, 2H, H-8, H-12), 5.05 (bs, 1H, OH), 4.92 (d, *J* = 4.6 Hz, 1H, OH), 4.85 (d, *J* = 4.7 Hz, 1H, OH), 4.44 – 4.28 (m, 1H, OH), 3.61 (ddd, *J* = 15.3, 10.9, 3.6 Hz, 2H, H-1, H-6a), 3.51 – 3.38 (m, 1H, H-6b), 3.24 – 3.13 (m, 1H,

H-3), 3.12 – 3.01 (m, 2H, H-4, H-5), 3.01 – 2.88 (m, 2H, H-2, H-7a), 2.80 (dd,  $J = 16.1, 8.8$  Hz, 1H, H-7b).  $^{13}\text{C}$  NMR (126 MHz, DMSO):  $\delta$  197.5, 157.2, 141.7, 135.2, 129.4, 126.1, 118.9, 117.1, 114.2, 80.2, 77.6, 75.3, 73.0, 69.8, 60.6, 42.8. Elemental Anal. Found: C (59.18%) H (6.29%) Calcd for  $\text{C}_{21}\text{H}_{28}\text{O}_7 = \text{C}$  (59.25%) H (6.22%).

### Compound 5b

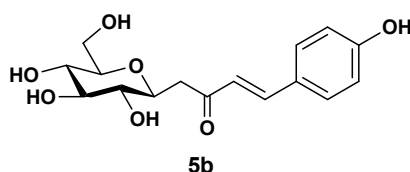

To a solution of 1-*C*-( $\beta$ -D-glucopyranosyl)-propan-2-one (5.0 g, 23.0mmol) and 4-hydroxybenzaldehyde (3.42g 28.0mmol) in ethanol (4.5mL) was added TEA (0.11 mL, 0.77mmol) and proline (0.4g 3.45mmol) at room temperature. The reaction mixture was stirred at r.t. for 48 h. After completion of the reaction as indicated by TLC (1:2 petroleum ether-ethyl acetate), the product was precipitated in the solvent (ethanol). Then filtered the product and washed with cold water. The pure product was then obtained 5.31g, in 85.6% yield; light yellow powders;  $^1\text{H}$  NMR (500 MHz, DMSO)  $\delta$  7.53 (d,  $J = 8.5$  Hz, 2H, H-10, H-12), 7.48 (d,  $J = 16.1$  Hz, 1H, H-9), 6.79 (d,  $J = 8.4$  Hz, 2H, H-11, H-13), 6.71 (d,  $J = 16.1$  Hz, 1H, H-8), 3.65 – 3.52 (m, 2H, H-1, H-6a), 3.38 (dd,  $J = 11.7, 4.8$  Hz, 1H, H-6b), 3.17 (t,  $J = 8.2$  Hz, 1H, H-3), 3.11 – 2.99 (m, 1H, H-4, H-5), 2.94 (t,  $J = 9.1$  Hz, 1H, H-2), 2.92 – 2.85 (m, 1H, H-7a), 2.74 (dd,  $J = 16.0, 8.8$  Hz, 1H, H-7b).  $^{13}\text{C}$  NMR (126 MHz, DMSO):  $\delta$  197.3, 159.1, 142.0, 129.9, 124.8, 122.9, 115.4, 80.1, 77.6, 75.4, 73.0, 69.8, 60.6, 42.7. Elemental Anal. Found: C (59.20%) H (6.32%) Calcd for  $\text{C}_{21}\text{H}_{28}\text{O}_7 = \text{C}$  (59.25%) H (6.22%).

### Compound 5c

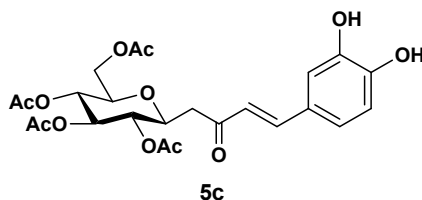

To a solution of compound **4c** (5.0 g, 23.0mmol) and 3,4-dihydroxybenzaldehyde (3.87g 28.0mmol) in ethanol (4.5mL) was added TEA (0.11 mL, 0.77mmol) and proline (0.4g 3.45mmol) at room temperature. The reaction mixture was stirred at r.t. for 48 h. After completion of the reaction as indicated by TLC (1:2 petroleum ether-ethyl acetate), the product was purified by silica gel column chromatography using 1:1



petroleum ether-ethyl acetate to furnish pure products 6.15g, in 92.3% yield; light yellow powders; <sup>1</sup>H NMR (500 MHz, CDCl<sub>3</sub>) δ 7.45 (d, *J* = 16.1 Hz, 1H, H-9), 7.13 (s, 1H, H-10), 6.98 (d, *J* = 8.3 Hz, 1H, H-12), 6.88 (d, *J* = 8.3 Hz, 1H, H-11), 6.56 (d, *J* = 16.1 Hz, 1H, H-8), 5.22 (t, *J* = 9.4 Hz, ), 5.08 (t, *J* = 9.5 Hz), 4.97 (t, *J* = 9.5 Hz), 4.24 (dd, *J* = 12.4, 4.9 Hz, 1H, H-6a), 4.09 – 3.98 (m, 2H, H-5, H-6b), 3.71 (ddd, *J* = 10.0, 3.8, 1.8 Hz, 1H, H-1), 2.97 (dd, *J* = 16.2, 6.9 Hz, 1H, H-7a), 2.65 (dd, *J* = 16.2, 2.4 Hz, 1H, H-7b), 2.01 (m, 12H, Ac). <sup>13</sup>C NMR (126 MHz, CDCl<sub>3</sub>): δ 196.1, 190.7, 170.3, 169.4, 169.2, 168.8, 146.5, 143.7, 143.3, 126.0, 122.8, 122.4, 114.6, 113.3, 74.7, 73.3, 73.2, 70.7, 67.7, 61.3, 41.4, 19.7. Elemental Anal. Found: C (56.63%) H (5.59%) Calcd for C<sub>21</sub>H<sub>28</sub>O<sub>7</sub> = C (56.69%) H (5.55%).

### Compound 6

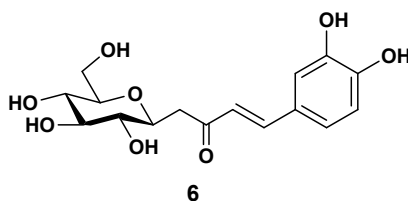

To a solution of compound **5c** (0.5 g, 0.98 mmol) and MeONa (0.1 g 1.56 mmol) in methanol (10 mL) was stirred at room temperature for 2h. After completion of the reaction, the mixture was treated with cation exchange resin (sodium form) to reach pH 5. The resin was filtered and methanol was evaporated. The final product was obtained 0.25g, in 75.1% yield; yellow oil, <sup>1</sup>H NMR (500 MHz, DMSO) δ 7.50 (d, *J* = 16.1 Hz, 1H, H-9), 7.12 (s, 1H, H-10), 6.99 (d, *J* = 8.3 Hz, 1H, H-12), 6.80 (d, *J* = 8.3 Hz, 1H, H-11), 6.54 (d, *J* = 16.1 Hz, H-8), 5.05 (bs, 1H, OH), 4.92 (bs, 1H, OH), 4.85 (bs, 1H, OH), 4.43 – 4.22 (m, 1H, H-4), 3.61 (ddd, *J* = 12.2, 9.3, 3.6 Hz, 2H, H-1, H-6a), 3.42 (dd, *J* = 12.4, 4.9 Hz, H-6b), 3.24 – 3.12 (m, 1H, H-3), 3.12 – 3.01 (m, 2H, H-4, H-5), 3.00 – 2.89 (m, 2H, H-2, H-7a), 2.80 (dd, *J* = 16.2, 8.6 Hz, 1H, H-7b). <sup>13</sup>C NMR (126 MHz, DMSO): δ 197.3, 147.4, 144.1, 143.5, 126.1, 122.9, 122.6, 114.8, 113.6, 80.1, 77.6, 75.4, 73.1, 69.8, 60.6, 42.7. Elemental Anal. Found: C (56.39%) H (5.98%) Calcd for C<sub>21</sub>H<sub>28</sub>O<sub>7</sub> = C (56.47%) H (5.92%).

# NMR Spectra for compounds

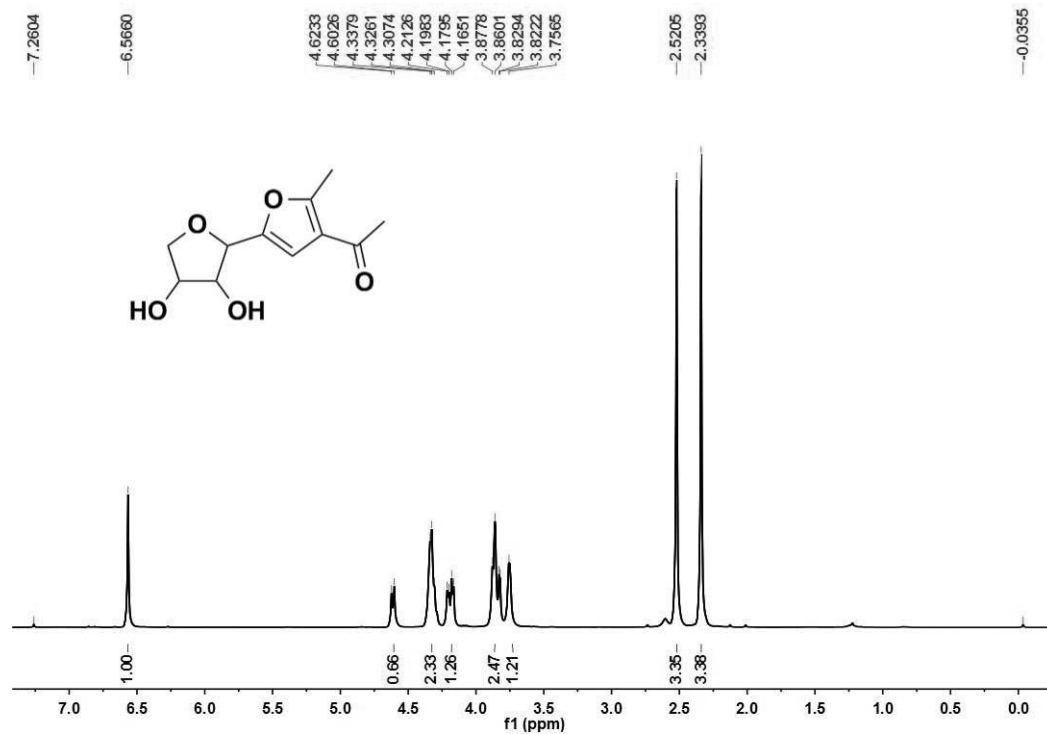

<sup>1</sup>H NMR spectra of 1

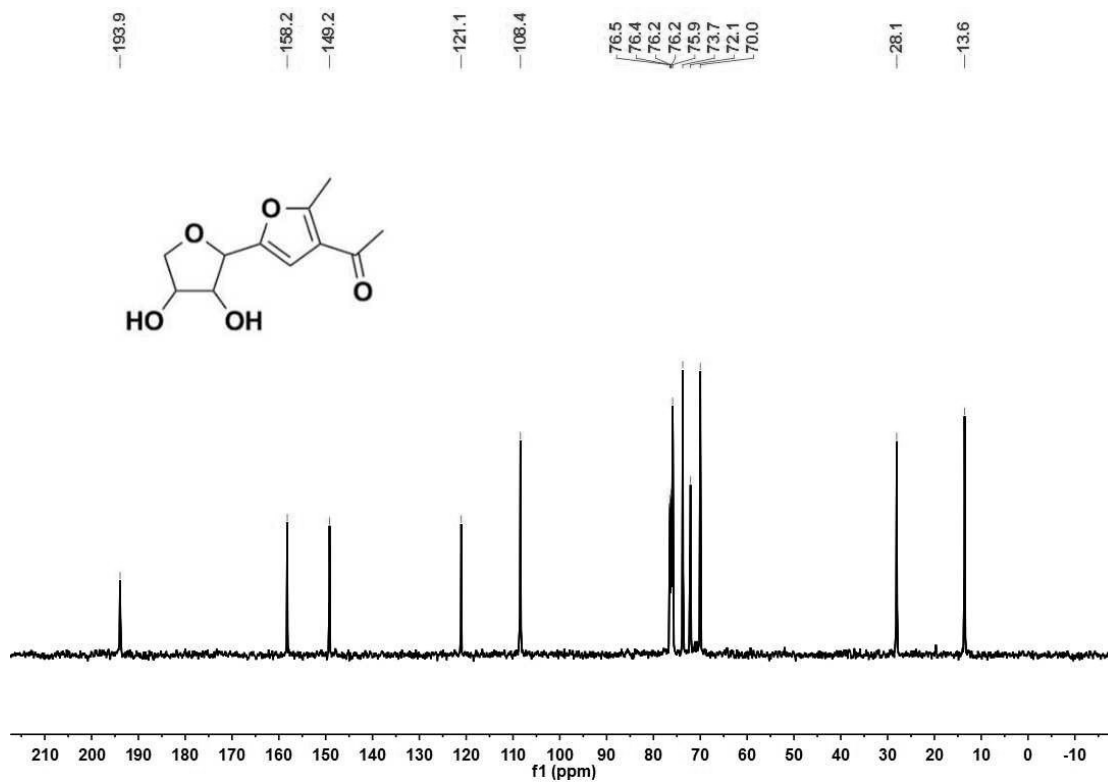

<sup>13</sup>C NMR spectra of 1

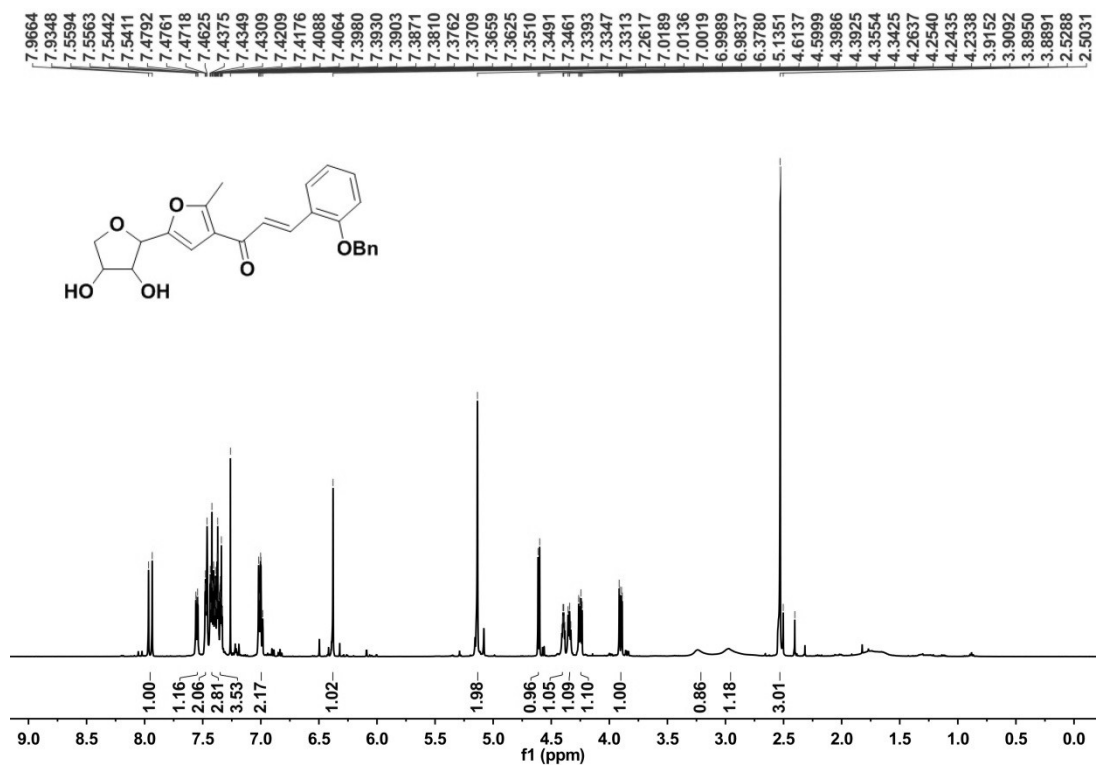

<sup>1</sup>H NMR spectra of **2a**

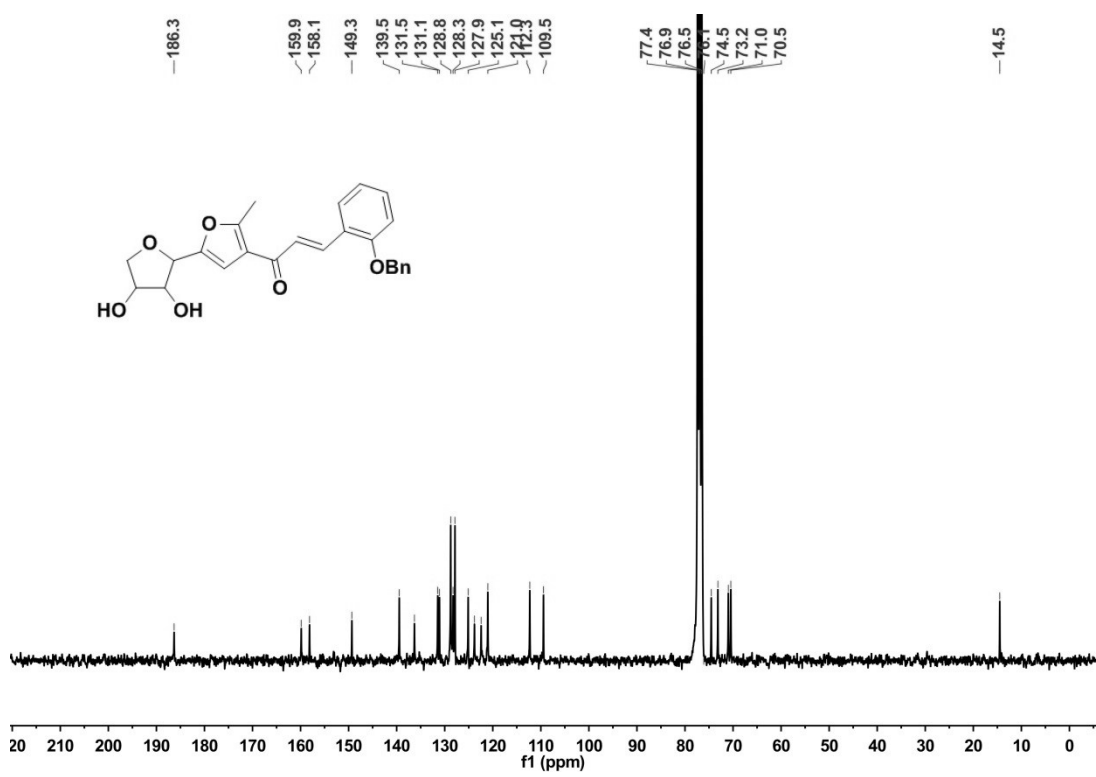

<sup>13</sup>C NMR spectra of **2a**

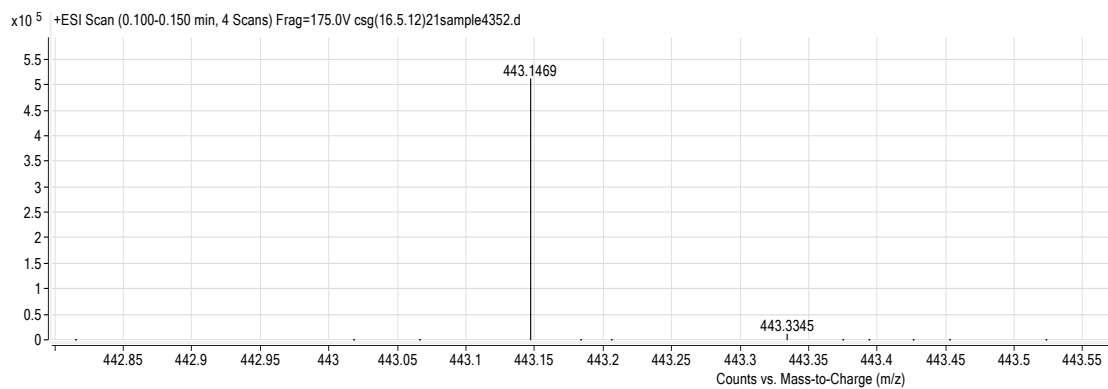

HRMS spectra of **2a**

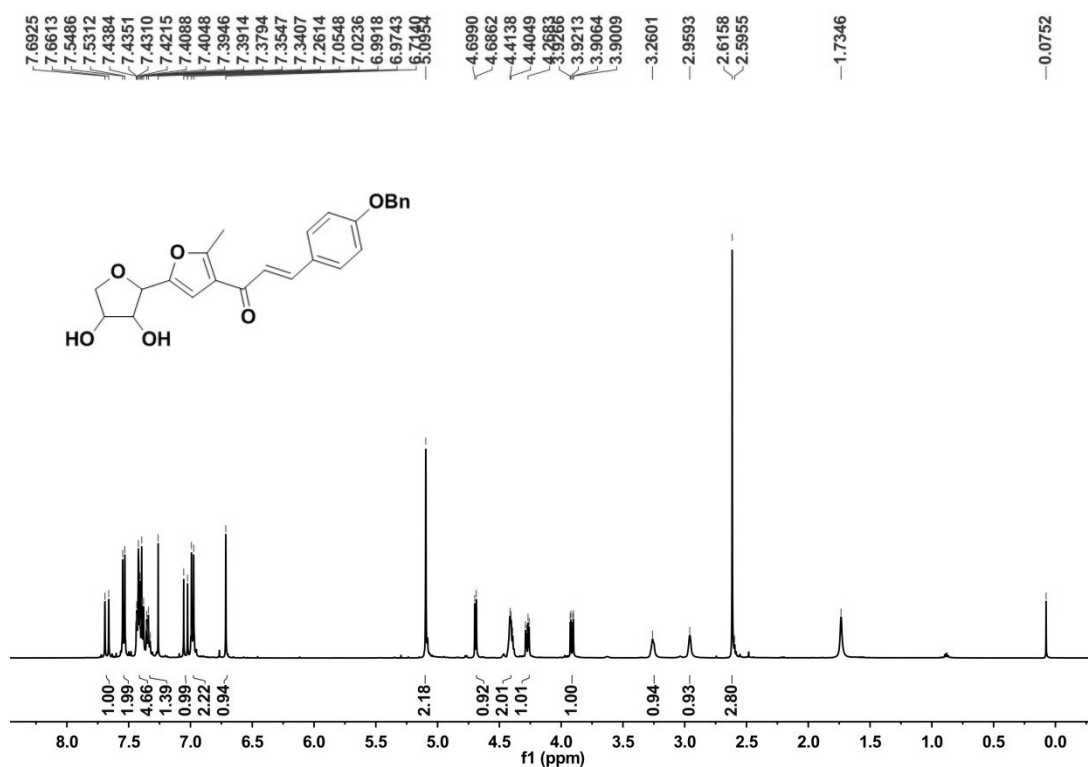

<sup>1</sup>H NMR spectra of **2b**

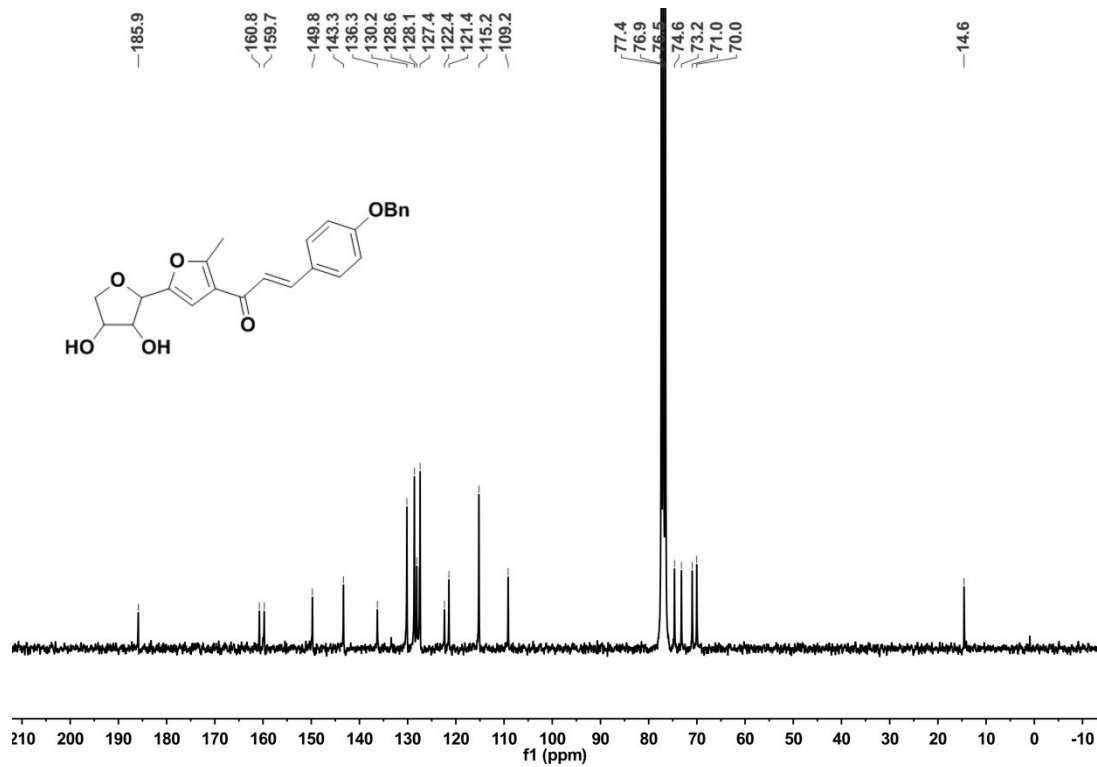

<sup>13</sup>C NMR spectra of **2b**

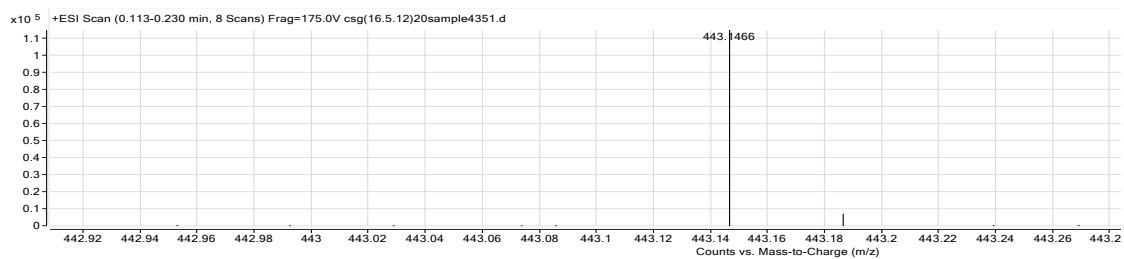

HRMS spectra of **2b**

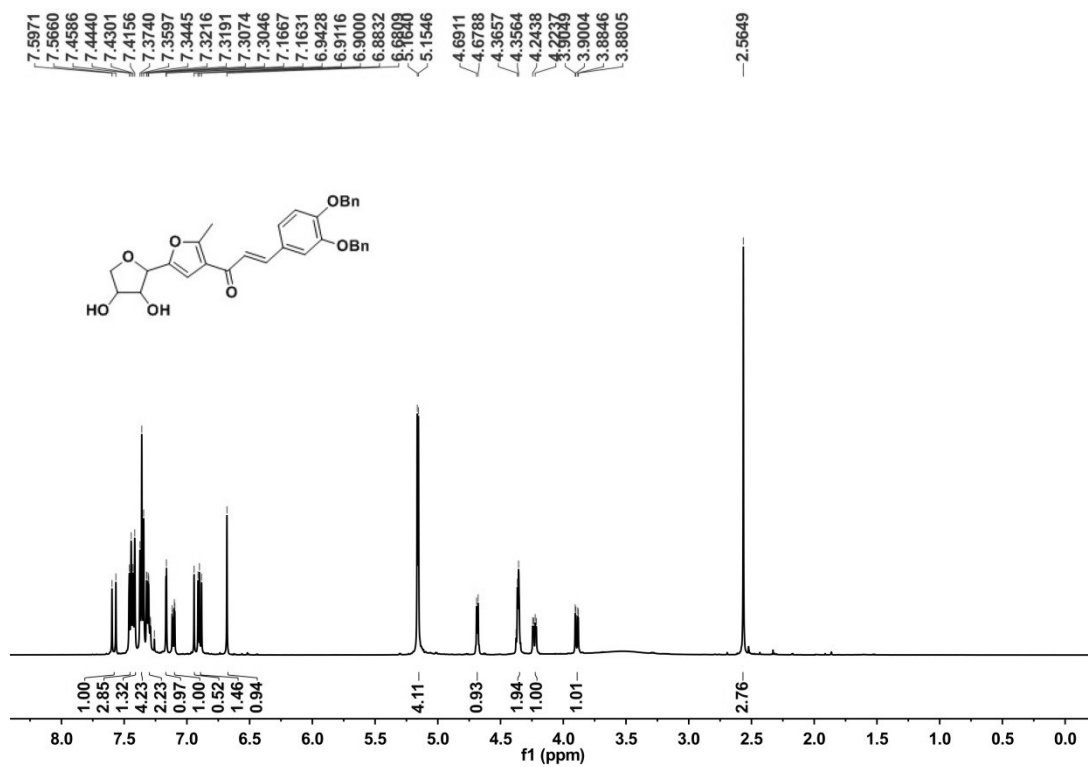

<sup>1</sup>H NMR spectra of **2c**

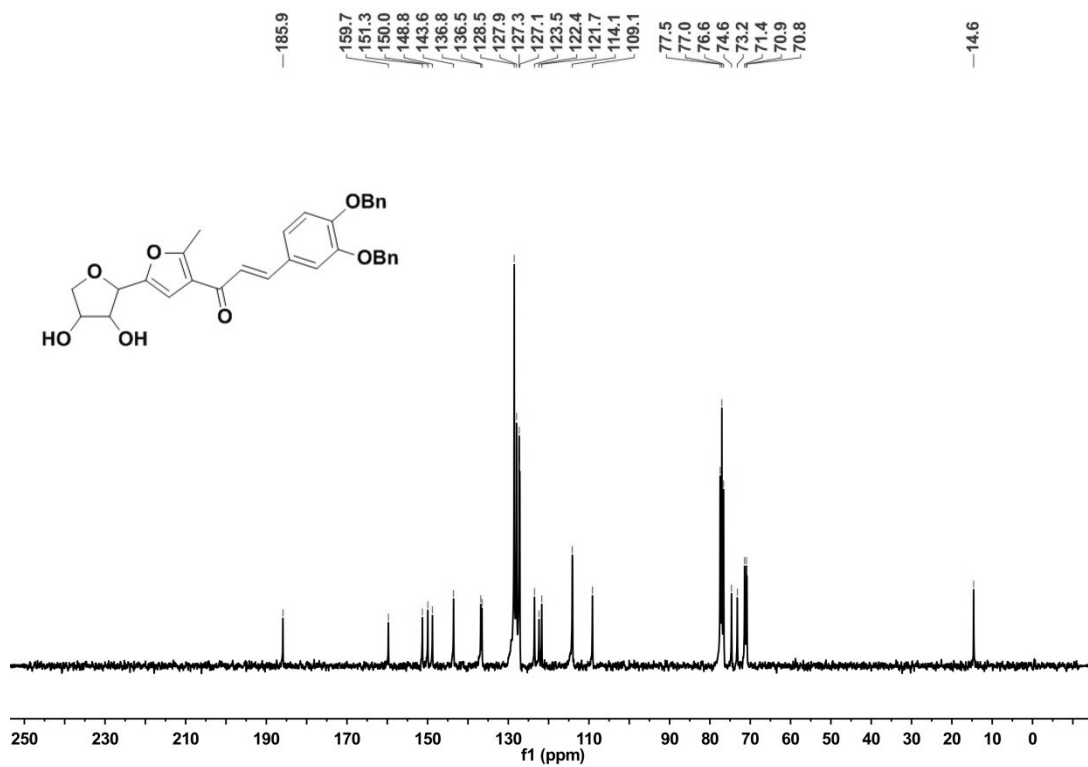

<sup>13</sup>C NMR spectra of **2c**

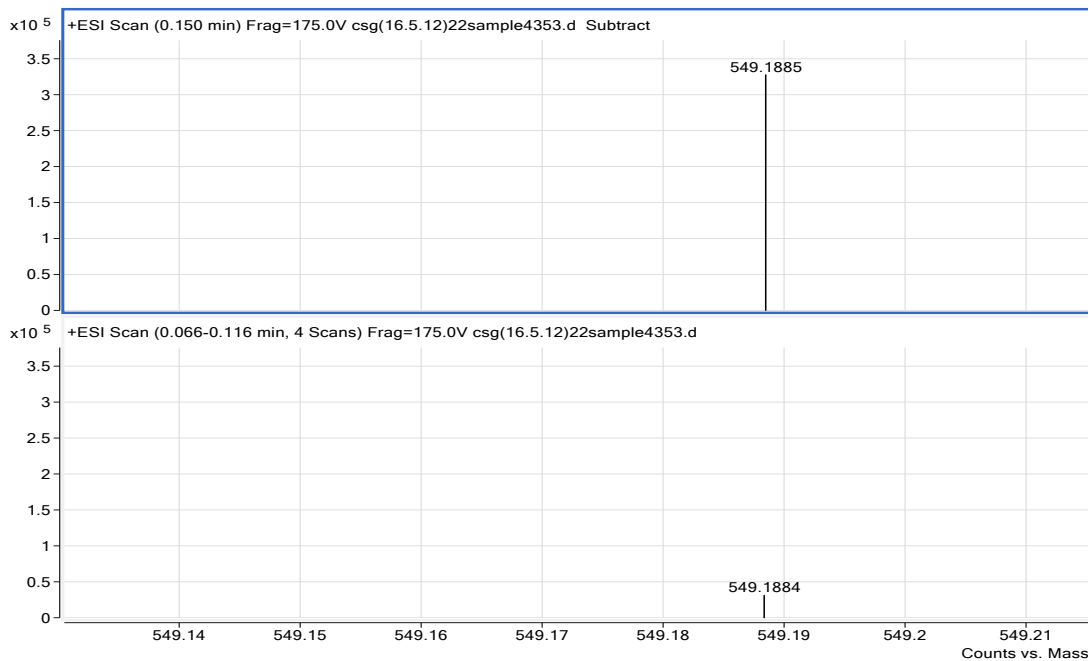

HRMS spectra of **2c**

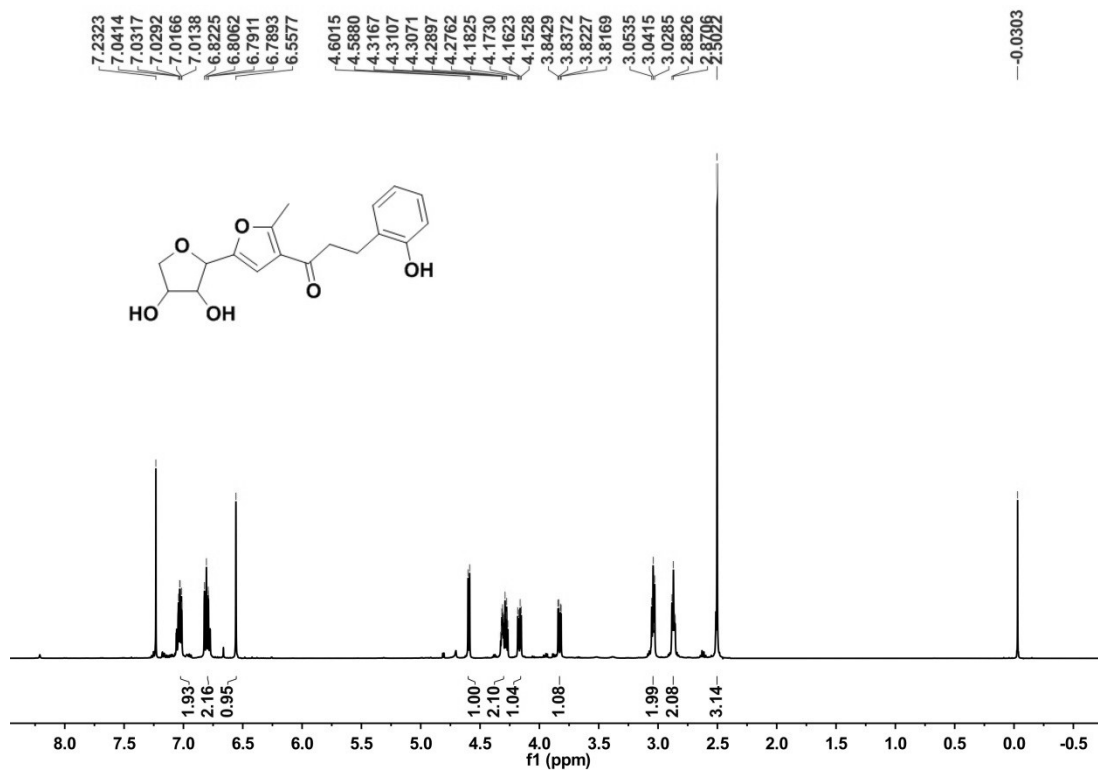

$^1\text{H}$  NMR spectra of **3a**

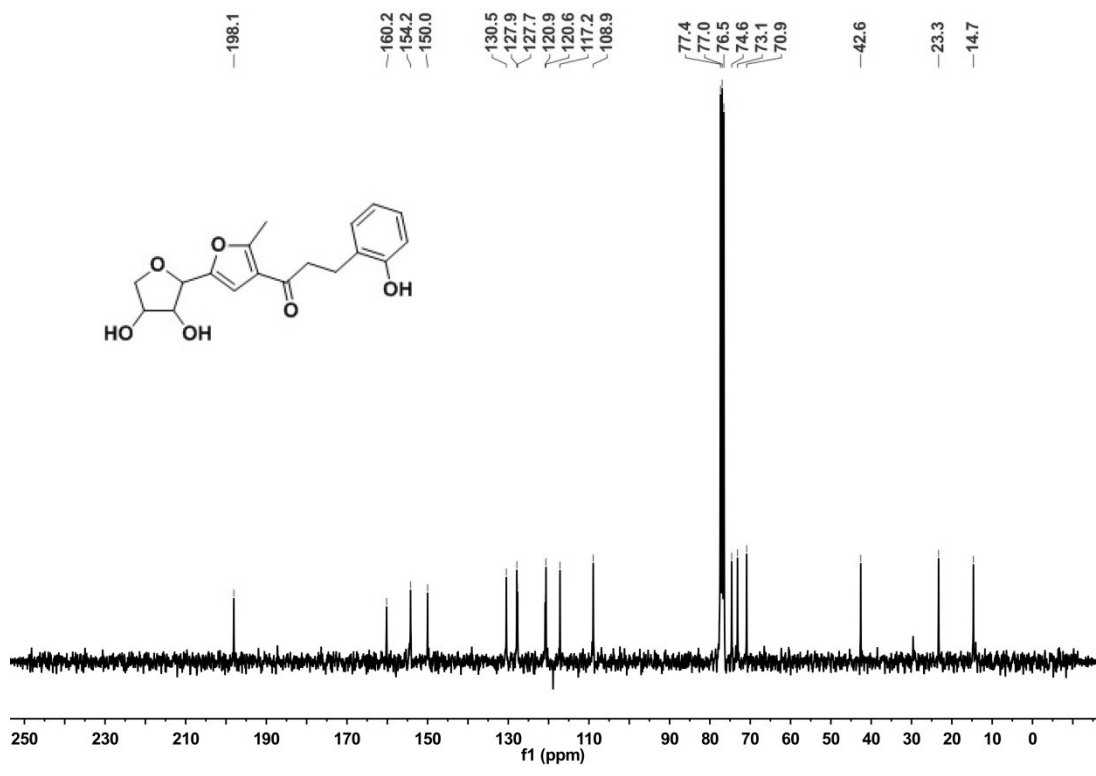

<sup>13</sup>C NMR spectra of 3a

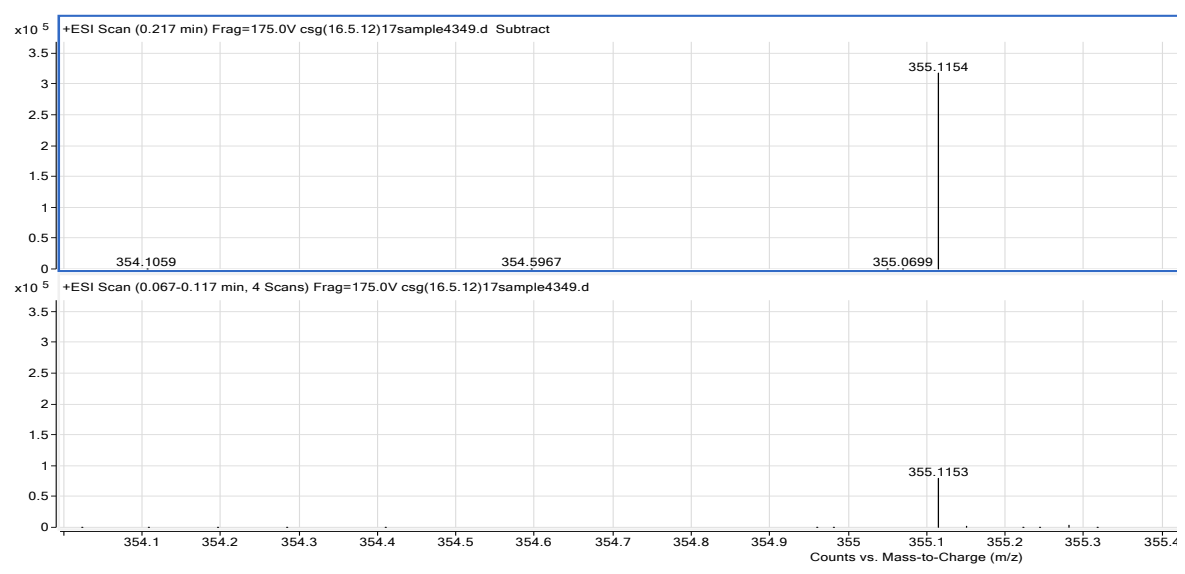

HRMS spectra of 3a



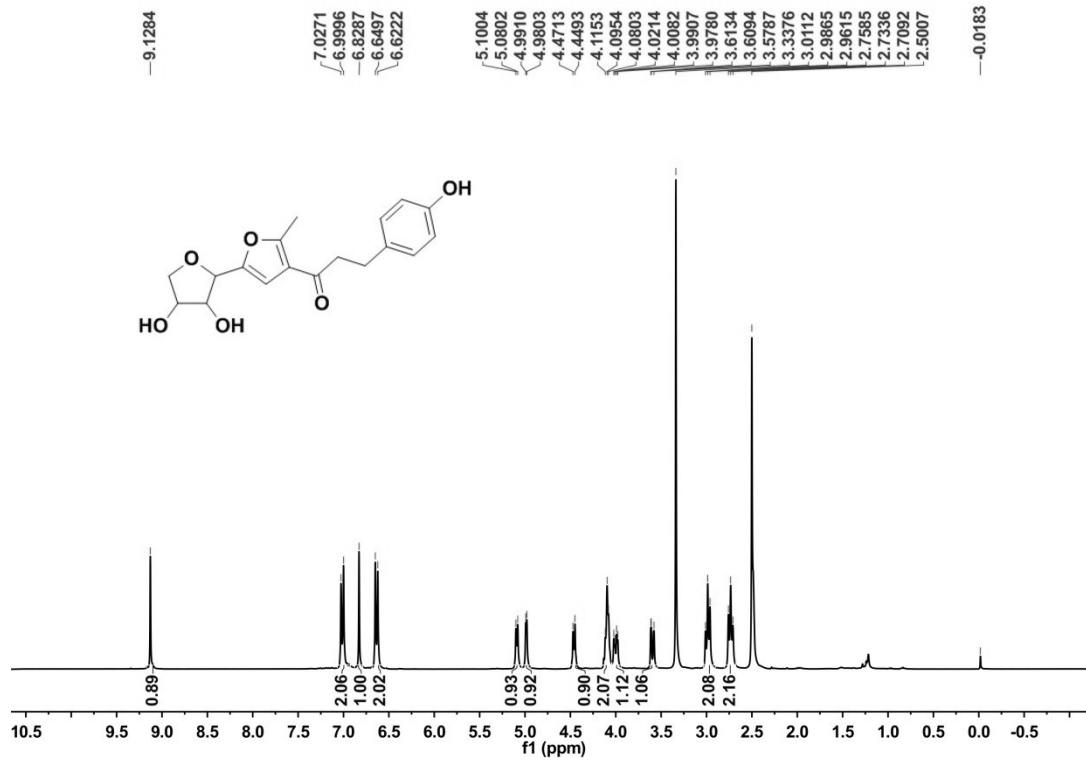

<sup>1</sup>H NMR spectra of **3b**

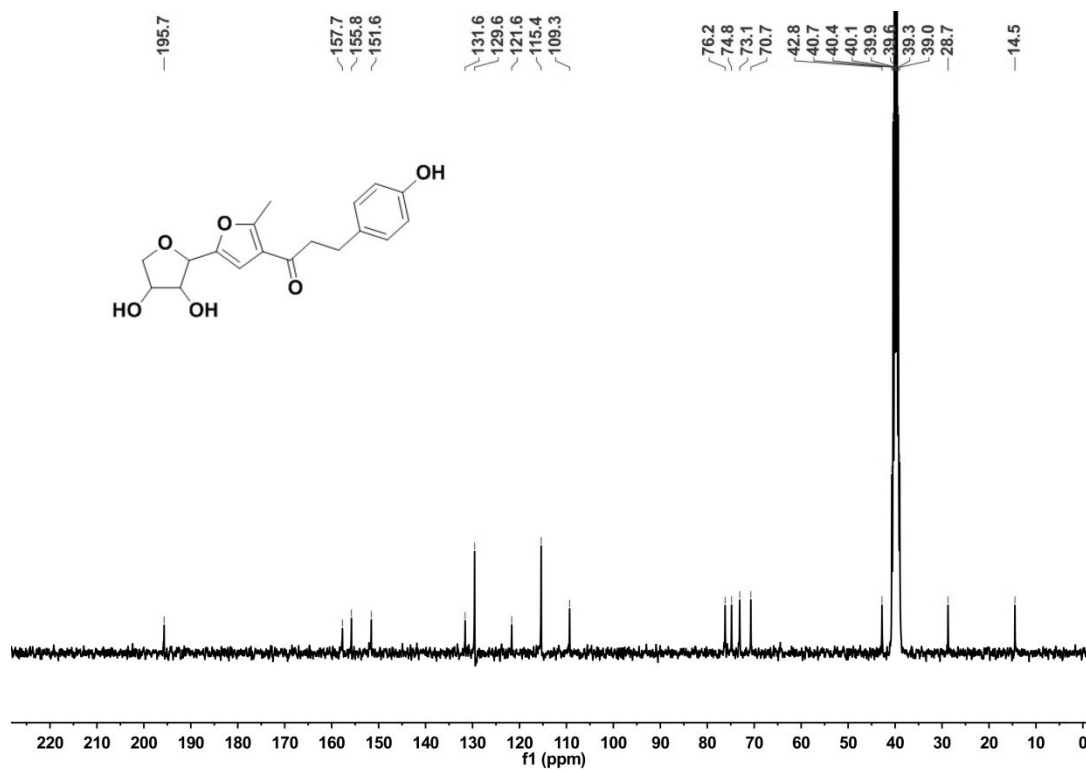

<sup>13</sup>C NMR spectra of **3b**

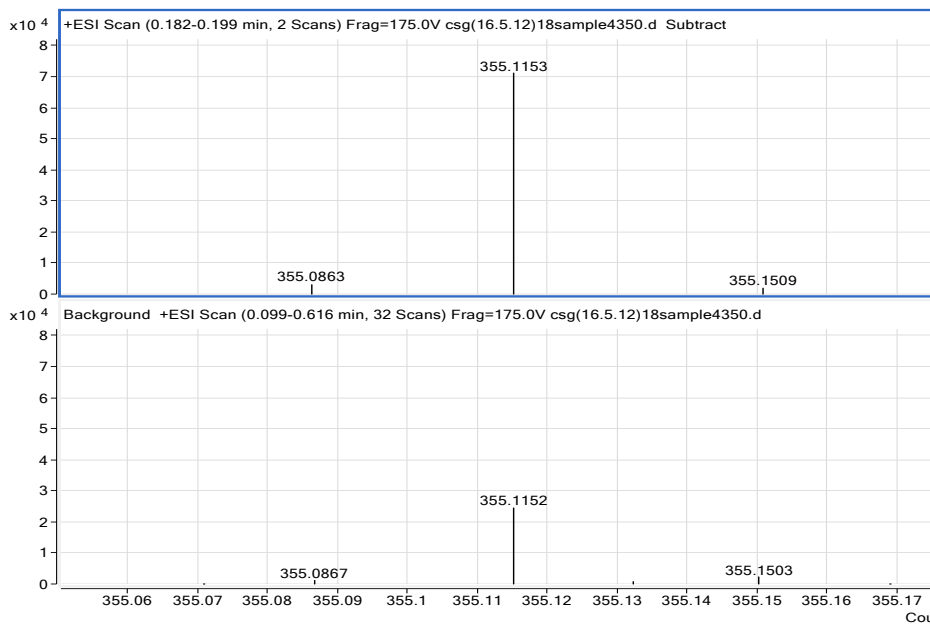

HRMS spectra of **3b**

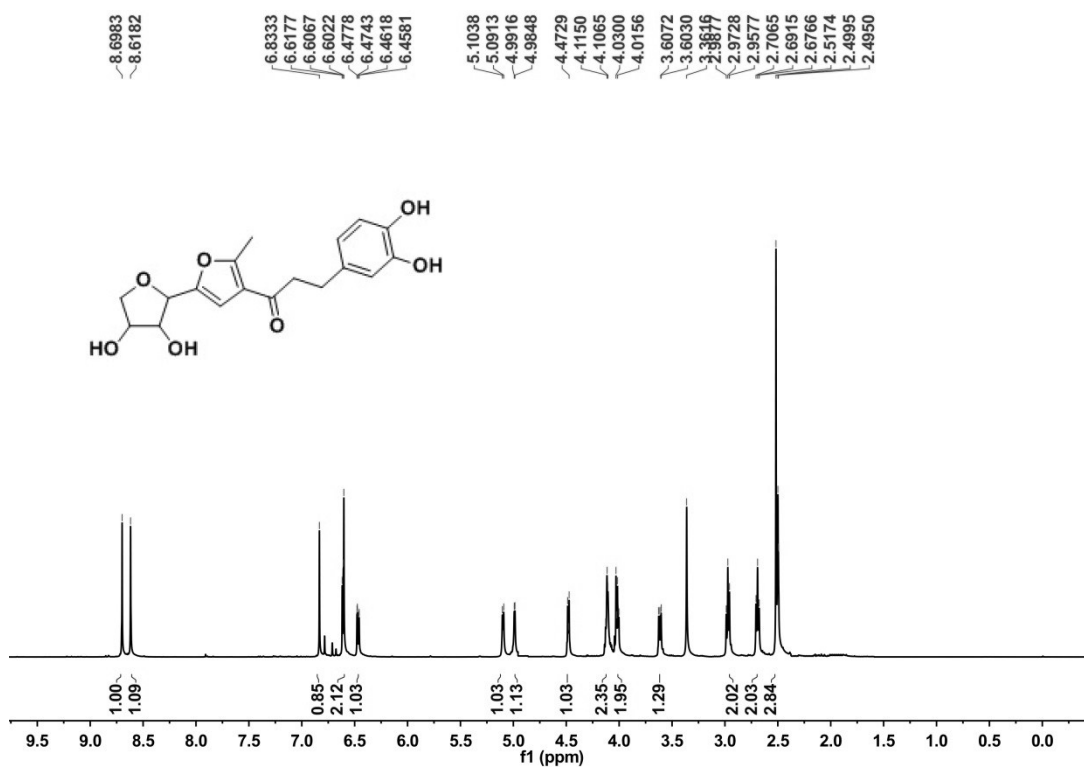

$^1\text{H}$  NMR spectra of **3c**

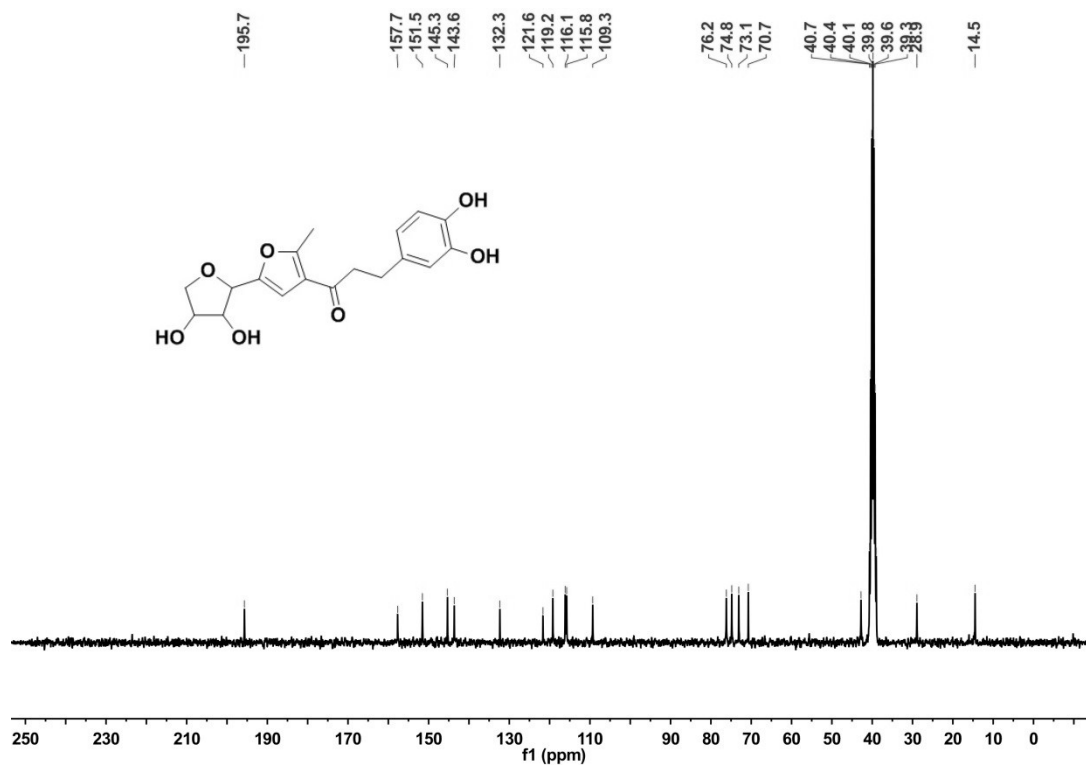

<sup>13</sup>C NMR spectra of **3c**

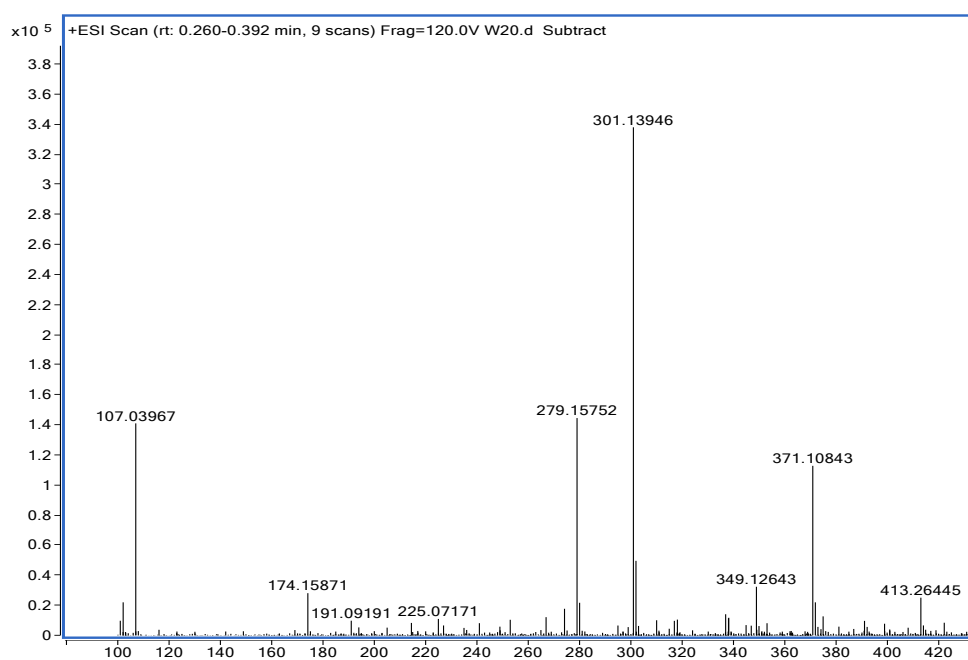

HRMS spectra of **3c**

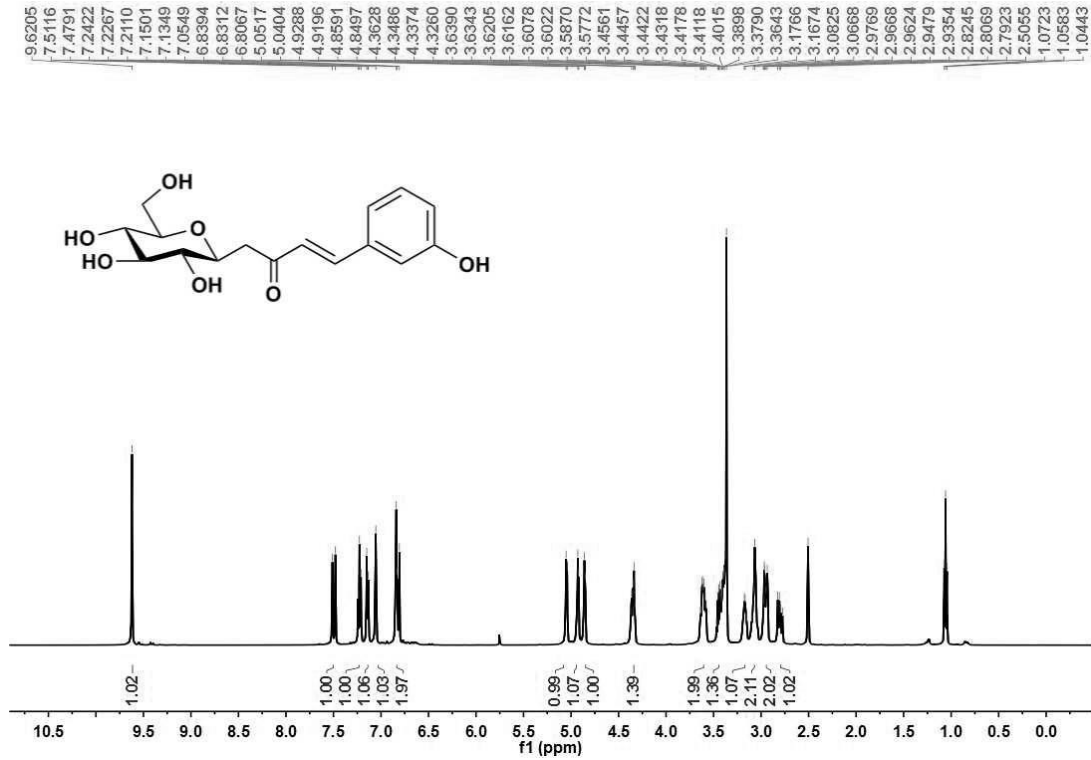

$^1\text{H}$  NMR spectra of **5a**

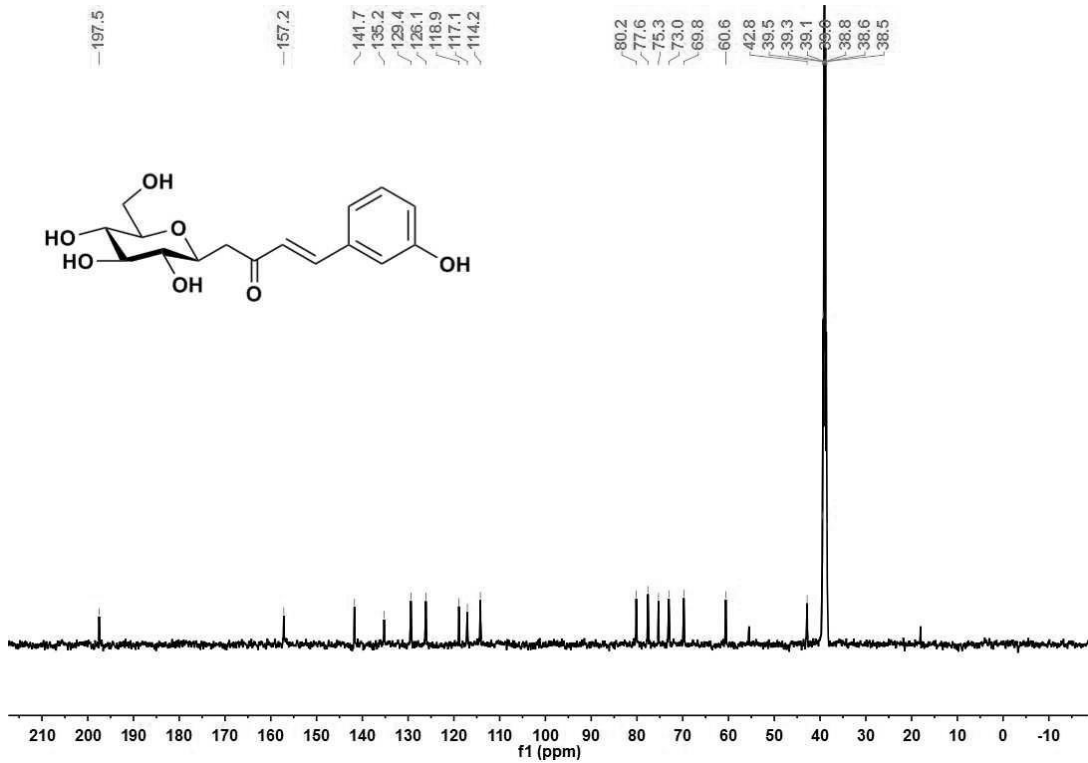

$^{13}\text{C}$  NMR spectra of **5a**

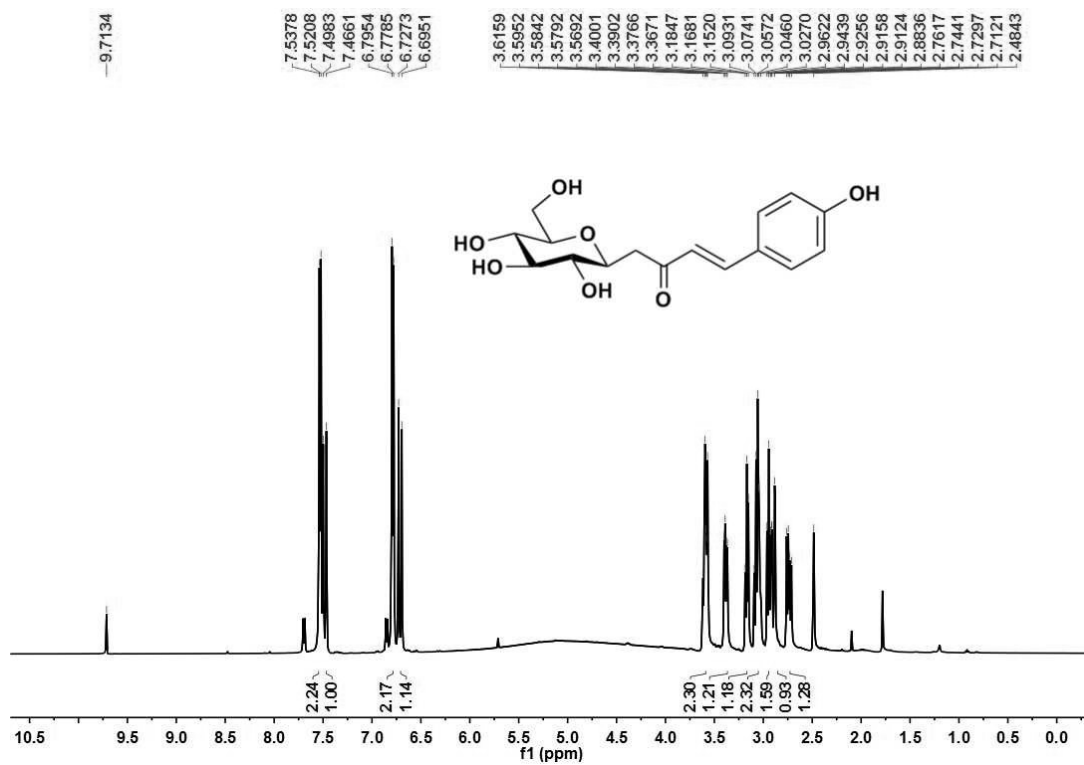

$^1\text{H}$  NMR spectra of **5b**

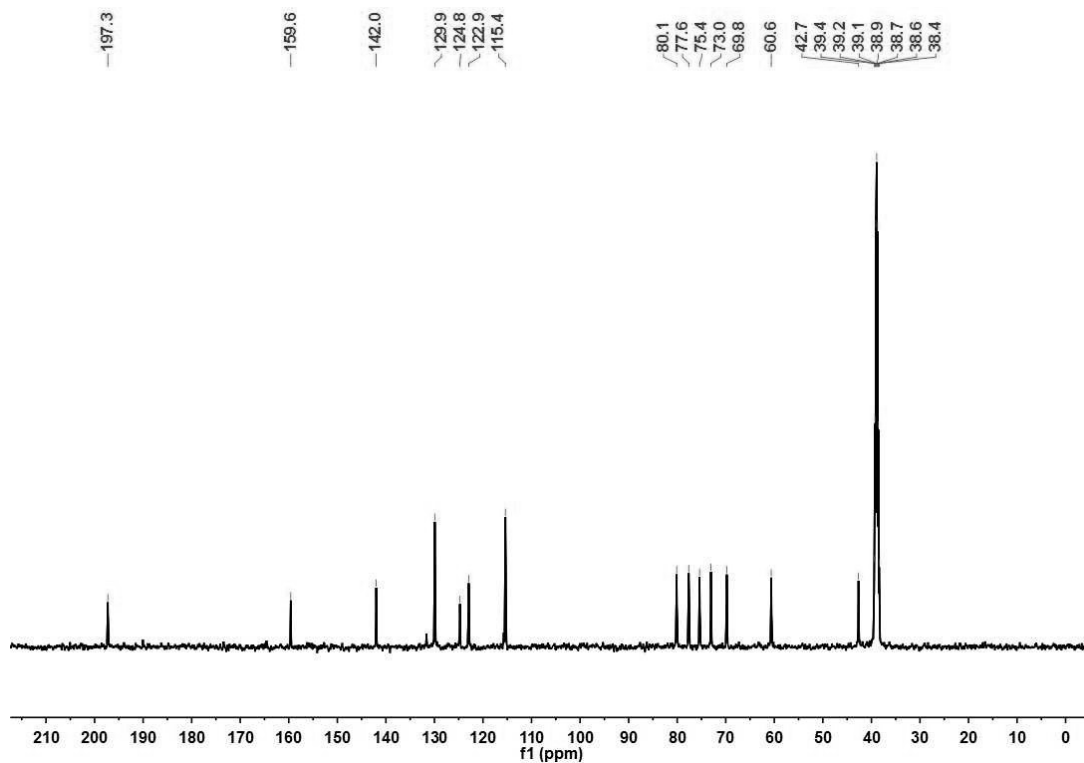

$^{13}\text{C}$  NMR spectra of **5b**

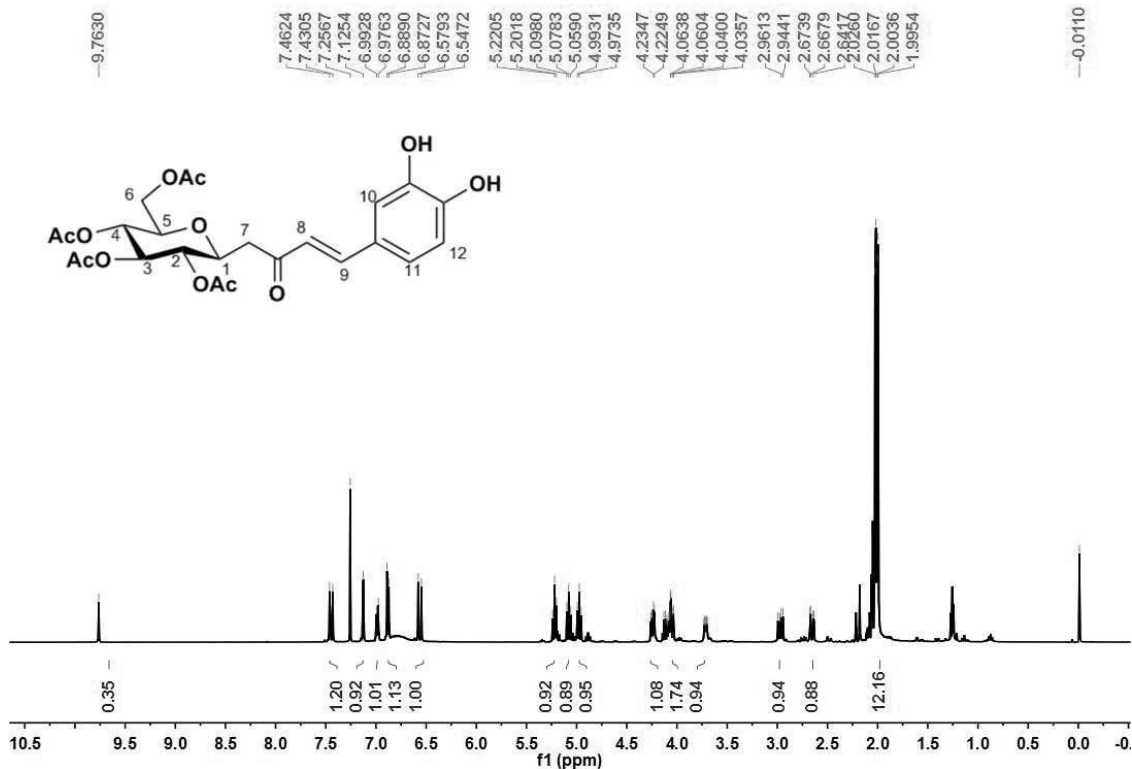

<sup>1</sup>H NMR spectra of 5c

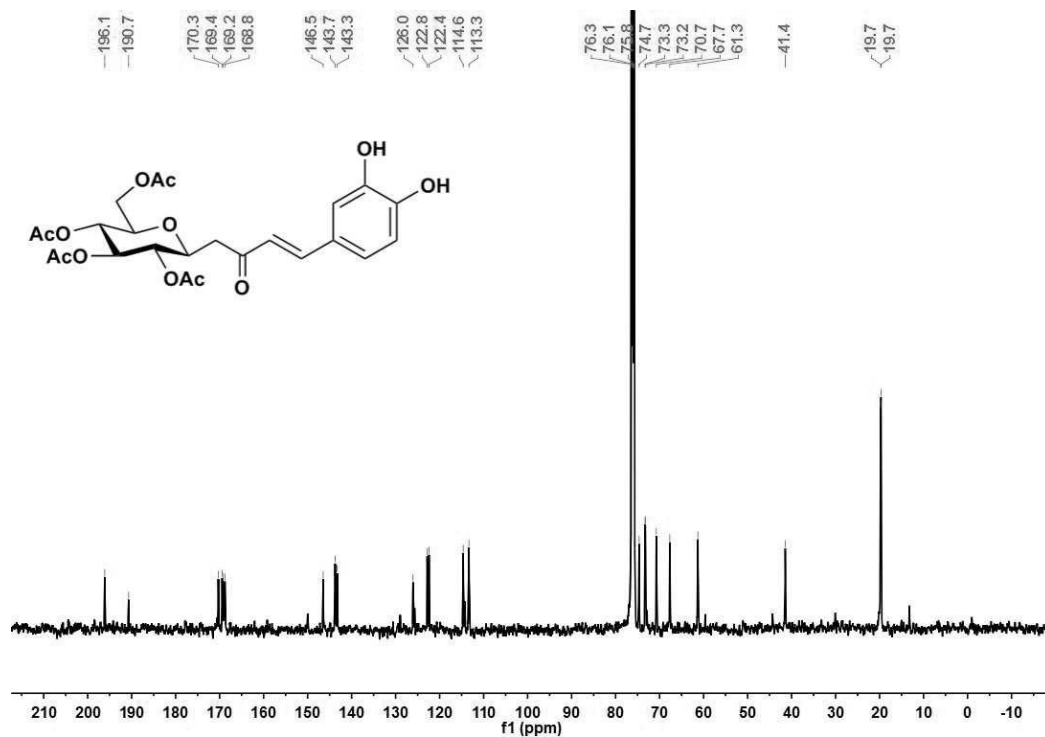

<sup>13</sup>C NMR spectra of 5c

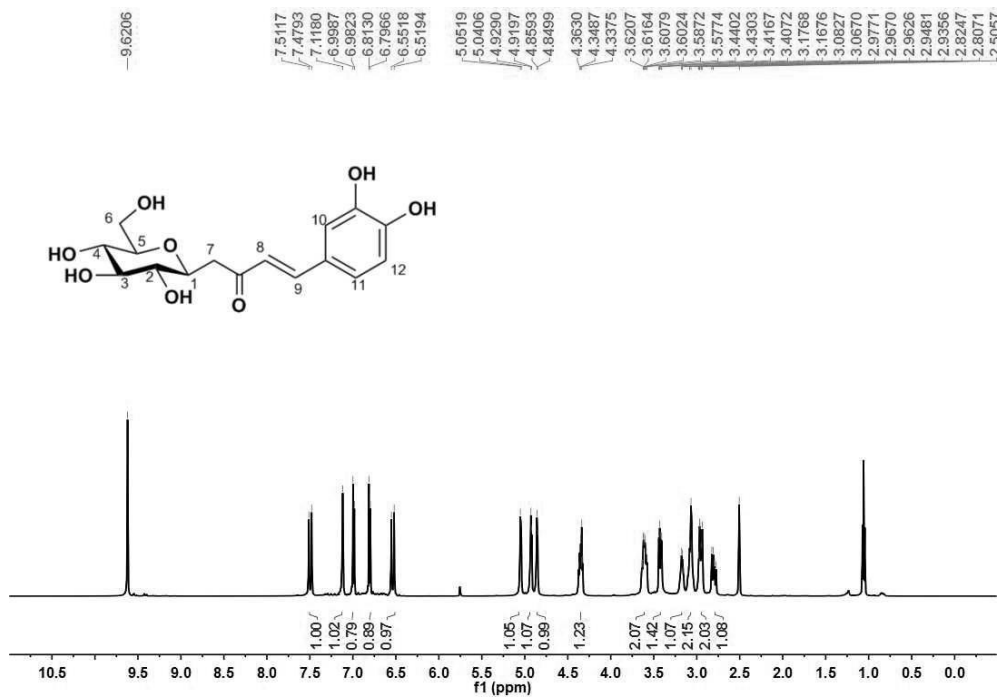

<sup>1</sup>H NMR spectra of 6

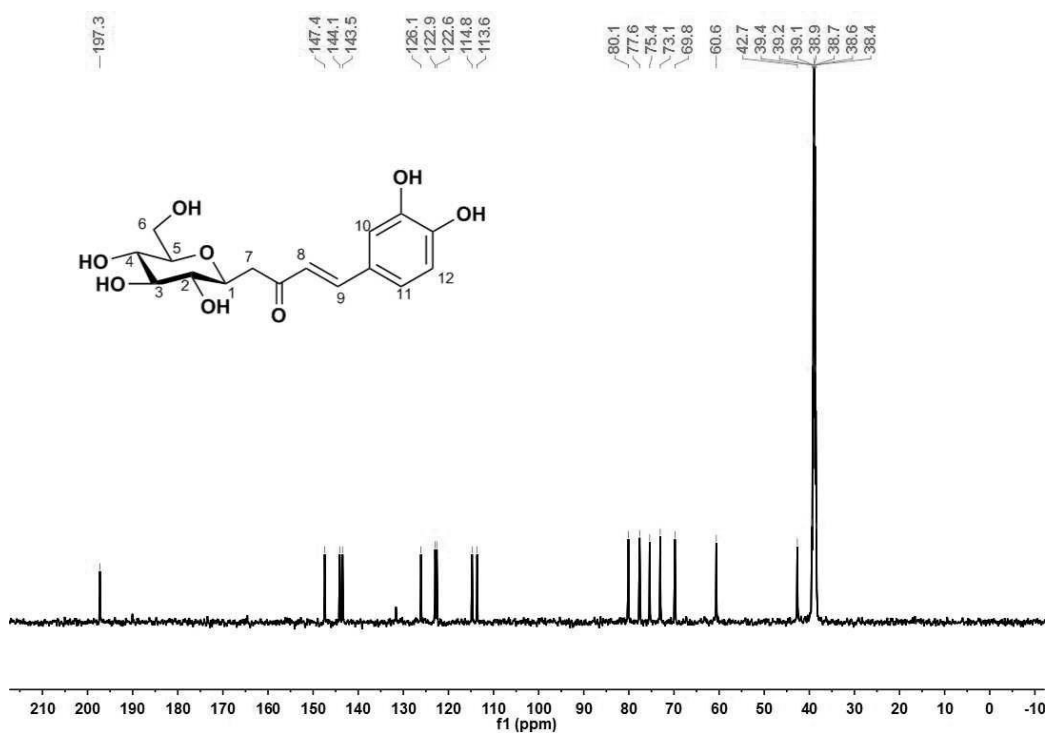

<sup>13</sup>C NMR spectra of 6
